# Supplementary material for: Coincidence of cholinergic pauses, dopaminergic activation and depolarisation of spiny projection neurons drives synaptic plasticity in the striatum
Source: PubMed Central journal article supplement (PMC8917208; doi:10.1038/s41467-022-28950-0), 2022-03-11
Supplement: 41467_2022_28950_MOESM1_ESM.pdf [file 41467_2022_28950_MOESM1_ESM.pdf]

## Supplementary information

### Coincidence of cholinergic pauses, dopaminergic activation and depolarisation of spiny projection neurons drives synaptic plasticity in the striatum

John N. J. Reynolds<sup>1\*†</sup>, Riccardo Avvisati<sup>2</sup>, Paul D. Dodson<sup>2</sup>, Simon D. Fisher<sup>1</sup>, Manfred J. Oswald<sup>1</sup>, Jeffery R. Wickens<sup>1,3</sup>, & Yan-Feng Zhang<sup>1,4\*†</sup>

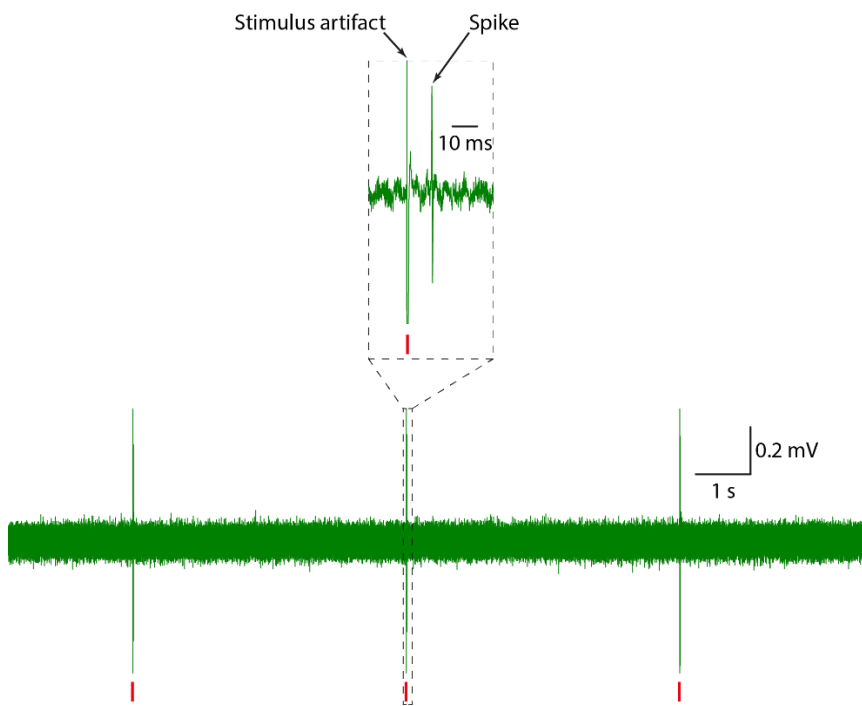

**Supplementary Fig. 1. Extracellular recording of a SPN.** A SPN with no spontaneous spiking activity fired action potentials only following cortical stimulation (red lines).

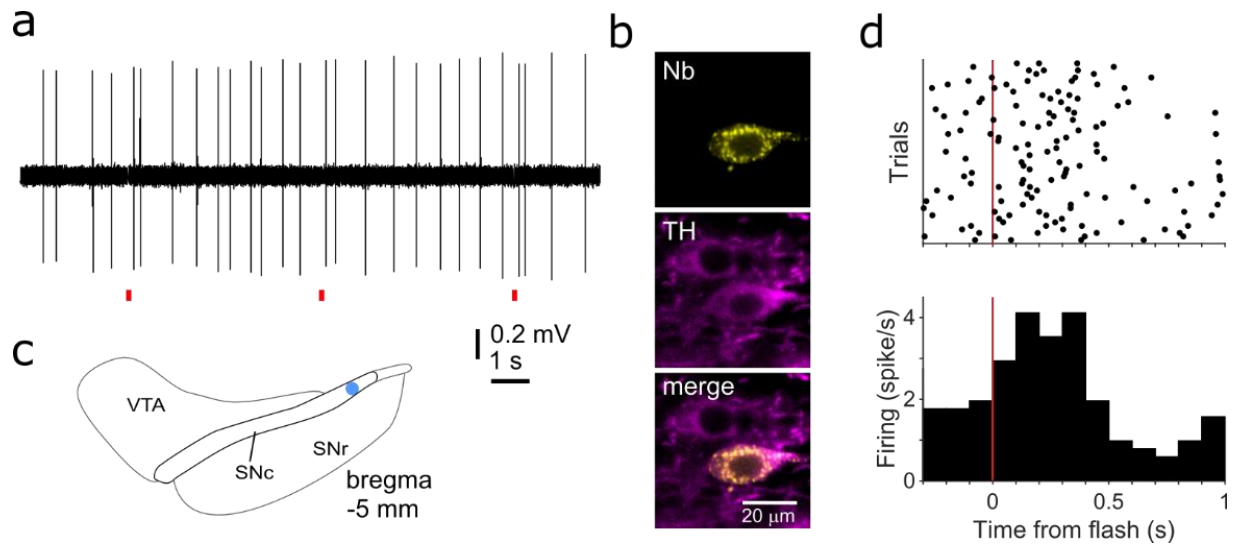

**Supplementary Fig. 2. Phasic spike activity of a dopamine neuron induced by a light flash after bicuculline injection into the SC.** **a** Extracellular single-unit *in vivo* recording from an identified midbrain dopamine neuron in the substantia nigra pars compacta (SNc) (**b-c**). Following bicuculline injection into the SC, a light flash to the contralateral eye (red dash in **a**) caused the neuron to increase its firing rate (**a, d**) as described by Dommett et al. (2005). **b** Following recording, the neuron was juxtacellularly labelled with neurobiotin (Nb) to determine its location (a representative example from two neurons) (**c**) and tested for immunoreactivity to tyrosine hydroxylase (TH) to confirm its neurochemical identity.
